# Supplementary material for: First patient-centred set of outcomes for pulmonary sarcoidosis: a multicentre initiative
Source: PubMed Central journal article supplement — BMJ Open Respir Res. 2019 Feb 18;6(1):e000394. doi: 10.1136/bmjresp-2018-000394 (PMC6424298; doi:10.1136/bmjresp-2018-000394), 2019-02-18
Supplement: bmjresp-2018-000394supp001.pdf [file bmjresp-2018-000394supp001.pdf]

## **SUPPLEMENTAL MATERIAL**

Defining a standard set of patient-centered outcomes for patients with pulmonary sarcoidosis

**Appendix 1.** Pulmonary sarcoidosis project group members and institutional affiliations.

**Appendix 2.** Care delivery value chain for pulmonary sarcoidosis.

**Appendix 3.** Reference guide and data collection.

**Appendix 4.** Prioritizing outcome indicators for the treatment of pulmonary sarcoidosis.

**Appendix 5.** King's Sarcoidosis questionnaire (KSQ)©.

**Appendix 6.** Fatigue Assessment Scale (FAS) .

**Appendix 1.** Pulmonary sarcoidosis project group members and institutional affiliations.

| <b>Country</b>  | <b>(Clinical) Speciality</b>       | <b>Name</b>                    | <b>Institutional Affiliation</b>                                                                 | <b>Expert group member</b> |
|-----------------|------------------------------------|--------------------------------|--------------------------------------------------------------------------------------------------|----------------------------|
| Belgium         | Pulmonologist                      | Wim Wuyts, MD, PhD, Prof       | University Hospitals Leuven, Belgium                                                             | Y                          |
| Belgium         | Nurse                              | Els den Dycker, RN             | University Hospitals Leuven, Belgium                                                             | N                          |
| The Netherlands | Pulmonologist                      | Jan Grutters, MD, PhD, Prof    | St. Antonius Hospital, Nieuwegein, The Netherlands                                               | Y                          |
| The Netherlands | Pulmonologist                      | Frouke van Beek, MD            | St. Antonius Hospital, Nieuwegein, The Netherlands                                               | Y                          |
| The Netherlands | Senior Researcher                  | Philip van der Wees, PhD, Prof | IQ Healthcare, Radboudumc, The Netherlands                                                       | Y                          |
| The Netherlands | Senior Advisor                     | Paul van der Nat, PhD          | St. Antonius Hospital, Nieuwegein, The Netherlands<br>IQ Healthcare, Radboudumc, The Netherlands | Y                          |
| The Netherlands | Chairman of the Board of Directors | Douwe Biesma, MD, PhD, Prof    | St. Antonius Hospital, Nieuwegein, The Netherlands                                               | N                          |
| The Netherlands | PhD Candidate                      | Nynke Kampstra, MPH            | St. Antonius Hospital, Nieuwegein, The Netherlands                                               | Y                          |
| The Netherlands | Pulmonologist                      | Marlies Wijsenbeek, MD, PhD    | Erasmus Medical Center, Nederland                                                                | Y                          |
| The Netherlands | Pulmonologist                      | Bernt van den Blink, MD, PhD   | Erasmus Medical Center, Netherlands                                                              | Y                          |
| The Netherlands | Senior researcher                  | Wim van den Bosch, PhD         | St. Antonius Hospital, Nieuwegein, The Netherlands                                               | Y                          |
| UK              | Pulmonologist                      | Elizabeth Renzoni, MD, PhD     | Royal Brompton Hospital, Imperial College, London, UK                                            | Y                          |
| UK              | Pulmonologist                      | Vasillis Kouranos, MD, PhD     | Royal Brompton Hospital, Imperial College, London, UK                                            | Y                          |
| USA             | Pulmonologist                      | Robert P. Baughman, MD, Prof   | University of Cincinnati Medical Center, Cincinnati, USA                                         | Y                          |
| USA             | Oncologist                         | Elyse E. Lower, MD             | University Hospital, Cincinnati, USA                                                             | Y                          |
| USA             | Pulmonologist                      | Daniel Culver, DO              | Cleveland Clinic, Cleveland, USA                                                                 | Y                          |

## Appendix 2. Care delivery value chain for pulmonary sarcoidosis.

| <b>INFORMING AND ENGAGING</b>   | * Stop smoking program                                                                                                                                                                                                           | * Stop smoking program                                                                                                                                                | * Stop smoking program                                                                                                                                                                                                                                           | * Stop smoking program                                                                                                                                       | * Stop smoking program                                                                                                                                                               |                        |
|---------------------------------|----------------------------------------------------------------------------------------------------------------------------------------------------------------------------------------------------------------------------------|-----------------------------------------------------------------------------------------------------------------------------------------------------------------------|------------------------------------------------------------------------------------------------------------------------------------------------------------------------------------------------------------------------------------------------------------------|--------------------------------------------------------------------------------------------------------------------------------------------------------------|--------------------------------------------------------------------------------------------------------------------------------------------------------------------------------------|------------------------|
|                                 | * Counseling patient and family on diagnostic procedures                                                                                                                                                                         | * Counseling patient & family on diagnosis                                                                                                                            | * Counseling on treatment process                                                                                                                                                                                                                                | * Counseling on rehabing options/pr                                                                                                                          | * Counseling on chronic nature disease recurrence of disease                                                                                                                         |                        |
|                                 | * Brochures on diagnostic procedures                                                                                                                                                                                             | * Brochure on disease                                                                                                                                                 | * Inform on diagnostic procedures                                                                                                                                                                                                                                | * Brochure on side effects                                                                                                                                   |                                                                                                                                                                                      |                        |
|                                 |                                                                                                                                                                                                                                  | * Explaining treatment options/ shared decision making (SDM)                                                                                                          | * Brochures on diagnostic procedures                                                                                                                                                                                                                             |                                                                                                                                                              |                                                                                                                                                                                      |                        |
|                                 | * Brochures on treatment modalities                                                                                                                                                                                              | * Psychological counseling patient and family                                                                                                                         |                                                                                                                                                                                                                                                                  |                                                                                                                                                              |                                                                                                                                                                                      |                        |
| <b>MEASURING</b>                | * Questionnaires by patient<br>Environmental exposure questions<br>Family history<br>Medical Research Council Disproe Score (MRC)<br>CIS20r Checklist Individual Strength<br>Quality of Life (SF36)<br>WPAI GH Work Productivity | * Laboratory (eg. liver, kidney, ...)<br>* Consultation ophthalmologist<br>* ECG                                                                                      | * Questionnaires: SF36, VAS5, CIS, M and WPAI GH<br>* Laboratory (ppILD, ACE, sIL2R)<br>* RR (blood pressure)<br>* BMI<br>* Pulmonary function<br>* X-thorax                                                                                                     | * Questionnaires: SF36, VAS5, CIS, M and WPAI GH<br>* Laboratory (ppILD, ACE, sIL2R)<br>* RR (blood pressure)<br>* BMI<br>* Pulmonary function<br>* X-thorax | * Questionnaires: SF36, VAS5, CIS, MRC and WPAI GH<br>* Laboratory (ppILD, ACE, sIL2R)<br>* RR (blood pressure)<br>* BMI<br>* Pulmonary function<br>* X-thorax<br>* DEXA (bone scan) |                        |
|                                 | * Laboratory (CRP, LDH, calcium, ACE, ACE genotype, sIL2R, PP-ILD, Quantiferon-TB)                                                                                                                                               |                                                                                                                                                                       |                                                                                                                                                                                                                                                                  |                                                                                                                                                              |                                                                                                                                                                                      |                        |
|                                 | * Pulmonary function (bodybox, spirometric, diff cap)                                                                                                                                                                            | <b>Optionally:</b>                                                                                                                                                    | <b>Optionally:</b>                                                                                                                                                                                                                                               | <b>Optionally:</b>                                                                                                                                           | <b>Optionally:</b>                                                                                                                                                                   |                        |
|                                 | * Bronchoscopy and >=3 mucosal biopsies                                                                                                                                                                                          | * 6 minutes walk test                                                                                                                                                 | * 6 minutes walk test                                                                                                                                                                                                                                            | * 6 minutes walk test                                                                                                                                        | * 6 minutes walk test                                                                                                                                                                |                        |
|                                 | * BAL: broncho alveolar lavage                                                                                                                                                                                                   | * FDG - PET                                                                                                                                                           | * FDG - PET                                                                                                                                                                                                                                                      | * FDG - PET                                                                                                                                                  | * FDG - PET                                                                                                                                                                          |                        |
|                                 | * Pathology (histology, cytology)                                                                                                                                                                                                | * Neurologist/LEP/MRI cerebral                                                                                                                                        | * Neurologist/CEP/MRI cerebral                                                                                                                                                                                                                                   | * Neurologist/CEP/MRI cerebral                                                                                                                               | * HRCT                                                                                                                                                                               |                        |
|                                 | * Maximal oxygen consumption VO2max                                                                                                                                                                                              | * Cardiologist MRI cor/Echo cor/24 h Holter                                                                                                                           | * Cardiologist MRI cor/Echo cor                                                                                                                                                                                                                                  | * Cardiologist MRI cor/Echo cor                                                                                                                              |                                                                                                                                                                                      |                        |
|                                 | * High Resolution CT with contrast (HRCT)                                                                                                                                                                                        |                                                                                                                                                                       | * HRCT                                                                                                                                                                                                                                                           | * HRCT                                                                                                                                                       |                                                                                                                                                                                      |                        |
|                                 | * Skin biopsies                                                                                                                                                                                                                  | other specialist measurements if indicated                                                                                                                            |                                                                                                                                                                                                                                                                  |                                                                                                                                                              |                                                                                                                                                                                      |                        |
|                                 | * Lymf node biopsies                                                                                                                                                                                                             | * Indications & Contraindications for specific treatment                                                                                                              |                                                                                                                                                                                                                                                                  |                                                                                                                                                              |                                                                                                                                                                                      |                        |
|                                 | <b>Optionally</b>                                                                                                                                                                                                                |                                                                                                                                                                       |                                                                                                                                                                                                                                                                  |                                                                                                                                                              |                                                                                                                                                                                      |                        |
|                                 | * FDG - PET                                                                                                                                                                                                                      |                                                                                                                                                                       |                                                                                                                                                                                                                                                                  |                                                                                                                                                              |                                                                                                                                                                                      |                        |
|                                 | * EUS - FNA/EBUS - FNA                                                                                                                                                                                                           |                                                                                                                                                                       |                                                                                                                                                                                                                                                                  |                                                                                                                                                              |                                                                                                                                                                                      |                        |
|                                 | * Lung biopsy (VATS)                                                                                                                                                                                                             |                                                                                                                                                                       |                                                                                                                                                                                                                                                                  |                                                                                                                                                              |                                                                                                                                                                                      |                        |
| * Echo kidney: nefrocalcinose?  |                                                                                                                                                                                                                                  |                                                                                                                                                                       |                                                                                                                                                                                                                                                                  |                                                                                                                                                              |                                                                                                                                                                                      |                        |
| <b>ACCESSING</b>                | * Outpatient visit                                                                                                                                                                                                               | * Outpatient visit                                                                                                                                                    | * Outpatient visit                                                                                                                                                                                                                                               | * Outpatient visit                                                                                                                                           | * Outpatient visit                                                                                                                                                                   |                        |
|                                 | * Laboratory                                                                                                                                                                                                                     | * Laboratory                                                                                                                                                          | * Laboratory                                                                                                                                                                                                                                                     | * Laboratory                                                                                                                                                 | * Laboratory                                                                                                                                                                         |                        |
|                                 | * Radiology                                                                                                                                                                                                                      | * Radiology                                                                                                                                                           | * Pharmacy                                                                                                                                                                                                                                                       | * Pharmacy                                                                                                                                                   | * Pharmacy                                                                                                                                                                           |                        |
|                                 | * Nuclear                                                                                                                                                                                                                        | * Nuclear                                                                                                                                                             | * Radiology                                                                                                                                                                                                                                                      |                                                                                                                                                              | * Radiology                                                                                                                                                                          |                        |
|                                 | * Pulmonary function test room                                                                                                                                                                                                   | * Pulmonary function test room                                                                                                                                        | * Pulmonary function test room                                                                                                                                                                                                                                   |                                                                                                                                                              | * Pulmonary function test room                                                                                                                                                       |                        |
| <b>STEPS</b>                    | <b>1. DIAGNOSING</b>                                                                                                                                                                                                             | <b>2. PREPARING</b>                                                                                                                                                   | <b>3. THERAPY</b>                                                                                                                                                                                                                                                | <b>4. RECOVERING/REHABING</b>                                                                                                                                | <b>5. MONITORING/MANAGING</b>                                                                                                                                                        | <b>PATIENT VALUE</b>   |
| <b>CARE DELIVERY ACTIVITIES</b> | * Anamnesis                                                                                                                                                                                                                      | * Multidisciplinary consult                                                                                                                                           | <b>Combination of options:</b>                                                                                                                                                                                                                                   | * Management of side effects                                                                                                                                 | * Follow-up anamnesis/                                                                                                                                                               | <b>PROVIDER MARGIN</b> |
|                                 | * Physical examination                                                                                                                                                                                                           | * Determining extrapulmonary involvement                                                                                                                              | * Pain medication (self care)                                                                                                                                                                                                                                    | * Controlled medication tapering                                                                                                                             | physical examination                                                                                                                                                                 |                        |
|                                 | * Multidisciplinary meeting/discussion suspected cardio-pulmonary disease suspected cardiac disease suspected other organ involvement                                                                                            | * Choice of treatment modality:<br>- farmaceutical yes/no<br>check absolute criteria<br>check relative criteria<br>- fysiotherapy yes/no<br>- watchful waiting yes/no | * Pain relief team<br>* Inhalation therapy<br>* Amitryptiline, pregabaline, ritalin, methylfenidaat...<br>* Immuno suppressive therapy corticosteroides, or methotrexaat, or TNF-alfa block (biological)<br>* Fysiotherapy<br>* Dietary advice<br>* Psychologist | * Dietary advice<br>* Case management<br>* Helen Downing Institute; learn patient to cope with chronic disease                                               | * Treatment for persistent disease activity<br>* Monitor for reactivation or progression of sarcoidosis                                                                              |                        |
|                                 | * Determining specific nature of disease                                                                                                                                                                                         |                                                                                                                                                                       |                                                                                                                                                                                                                                                                  |                                                                                                                                                              |                                                                                                                                                                                      |                        |
|                                 |                                                                                                                                                                                                                                  |                                                                                                                                                                       |                                                                                                                                                                                                                                                                  |                                                                                                                                                              |                                                                                                                                                                                      |                        |
|                                 |                                                                                                                                                                                                                                  |                                                                                                                                                                       |                                                                                                                                                                                                                                                                  |                                                                                                                                                              |                                                                                                                                                                                      |                        |
|                                 |                                                                                                                                                                                                                                  |                                                                                                                                                                       |                                                                                                                                                                                                                                                                  |                                                                                                                                                              |                                                                                                                                                                                      |                        |
|                                 |                                                                                                                                                                                                                                  |                                                                                                                                                                       |                                                                                                                                                                                                                                                                  |                                                                                                                                                              |                                                                                                                                                                                      |                        |
|                                 |                                                                                                                                                                                                                                  |                                                                                                                                                                       |                                                                                                                                                                                                                                                                  |                                                                                                                                                              |                                                                                                                                                                                      |                        |
|                                 |                                                                                                                                                                                                                                  |                                                                                                                                                                       |                                                                                                                                                                                                                                                                  |                                                                                                                                                              |                                                                                                                                                                                      |                        |
|                                 |                                                                                                                                                                                                                                  |                                                                                                                                                                       |                                                                                                                                                                                                                                                                  |                                                                                                                                                              |                                                                                                                                                                                      |                        |

Legenda

Medical Specialist

Other provider entity

## Appendix 3. Reference guide and data collection.

### FINAL INDICATOR SET

#### ➤ Mortality

**Variable:** date of death

**Definition:** Provide the date of the death.

**Timing:** update every 6 months

**Reporting Source:** clinical

**Response Options:** DD/MM/YY

#### ➤ Pulmonary function

**Variable:** pulmonary function

**Definition:** absolute and % predicted of FEV1, FVC and DLCOc (depending on severity of sarcoidosis)

Abbreviations:

DLCO= diffusing capacity for carbon monoxide

FEV1= forced expiratory volume in the first 1 second of expiration

FVC= forced vital capacity

**Timing:** every 3 to 6 months

**Reporting Source:** clinical

**Response Options:** DD/MM/YYYY

Absolute PFT in

% predicted PFT in mmol/min/kPa

#### ➤ Activity marker in blood reduction: sIL2R

**Variable:** Soluble Interleukine 2 receptor

**Definition:** Absolute and predicted FEV1, FVC and DLCOc

**Timing:** every 3 to 6 months

**Reporting Source:** clinical

**Response Options:** DD/MM/YYYY

sIL2R measured at each presentation.

1. Date measurement
2. sIL2R (measured in pg/ml, limit >3000)

#### ➤ Weight gain

**Variable:** weight gain

**Definition:** The weight in kilogram (kg) of a patient

**Timing:** Every visit to the clinic

**Reporting Source:** clinical

**Response Options:** weight in kg

➤ **Quality of Life**

**Variable:** Quality of Life; physical functioning

**Definition:** quality of life measured with:

- King's Sarcoidosis Questionnaire (KSQ), appendix 5.
- Fatigue Assessment Scale (FAS), appendix 6.

**Timing:** every 6 months

**Reporting Source:** patient reported

**Response Options:**

- KSQ: five modules (General health status, Lung, Skin, Eye, Medications) 29 questions
- FAS: 10 questions (on 5-point hedonic scale)

➤ **Osteoporosis**

**Variable:** osteoporosis

**Definition:** condition in which the bones become brittle and fragile from loss of tissue.

**Timing:** update every 6 months

**Reporting Source:** clinical

**Response Options:**

1= Normal  $>-1.0$

2= Osteopenia  $<-1.0, >-2.5$

3= Osteoporosis  $<-2.5$

4= Severe osteoporosis  $<-2.5$  plus fragility fractures

5= not indicated

Diagnosis T-score based on WHO Osteoporosis Classification

➤ **Clinical Outcome Status (COS)**

**Variable:** Clinical Outcome Status (COS)

**Definition:**

The definition of clinical phenotypes of the disease based on the clinical outcome status (COS).

- 2 years after initial diagnosis from the new patient cohort (+/- 6 months).
- Diagnosis date:
  - Diagnosed at the clinic: date of the multi-disciplinary meeting.
  - Diagnosed somewhere else: date letter lung physician when the diagnosis is announced.
- The retrospective patients which are still being treated will also be taken into account 5 years after initial diagnosis.

**Timing:** 2 and/or 5 year after diagnosis.

**Reporting Source:** clinical

**Response options:**

1: resolved never treated

2: resolved, no therapy >1 year

3: minimal disease never treated

4: minimal disease no therapy > 1 year

5: persistent-no current therapy, never treated

6: persistent-no current therapy, no therapy > 1 year

7: persistent-current therapy, asymptomatic

8: persistent-current therapy, symptomatic

9: persistent-current therapy, worsening prior year

999 = unknown

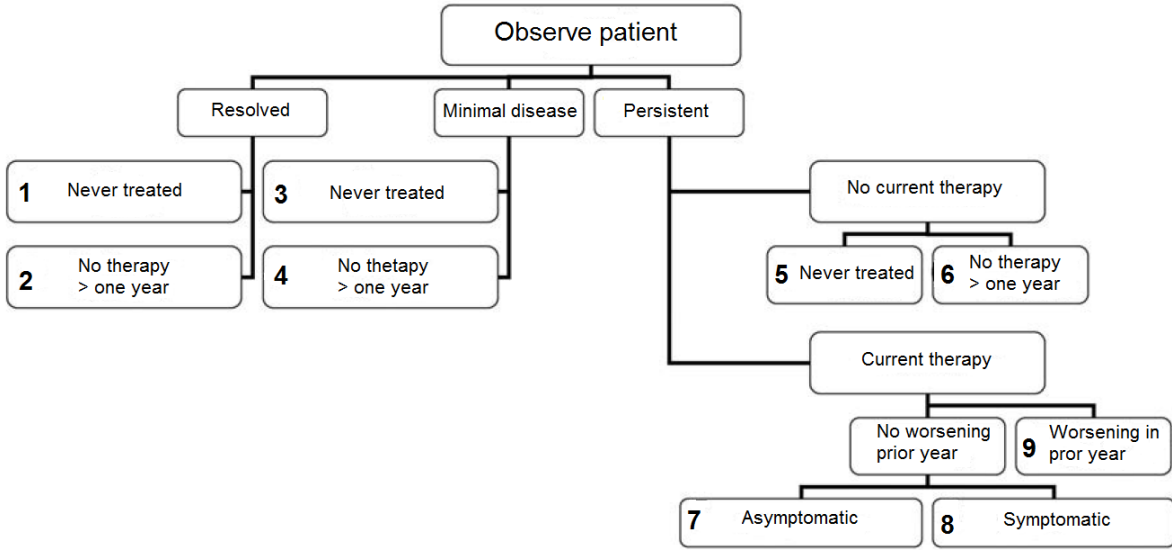

Baughman, R. P., Nagai, S., & Balter, M. (2011). Defining the clinical outcome status (COS) in sarcoidosis: results of WASOG Task Force. *Sarcoidosis vasculitis and diffuse lung disease*, 28(1), 56-64.

## CASE MIX VARIABLES

### ➤ Patient ID

**Variable:** Patient ID

**Definition:** Indicate the patient's medical record number

**Timing:** Baseline

**Reporting Source:** Administrative or clinical

**Response Options:** According to institution

## Demographic Factors

### ➤ Gender

**Variable:** Gender

**Definition:** Please indicate your sex at birth:

**Timing:** Baseline

**Reporting Source:** Patient-reported

**Response Options:**

0 = female

1 = male

### ➤ Age & Date of birth

**Variable:** Date of birth

**Definition:** date patient was born

**Timing:** Baseline

**Reporting Source:** Patient-reported

**Type:** Date by DD/MM/YYYY

### ➤ Ethnicity

**Variable:** Ethnicity

**Definition:** Varies by country and should be determined by country (not for cross country comparison)

**Timing:** Baseline

**Reporting Source:** Patient-reported

**Response Options:**

1= Black

2= White

3= Asian

or:

4 = Caucasian

5 = non-Caucasian

999= unknown

For Royal Brompton Hospital the categories Caucasian and non-Caucasian will be used as this is the only available information.

## Clinical Factors & Information

### ➤ Length

**Variable:** Height

**Definition:** height in centimeters

**Supporting Definition:** Height and weight are used to calculate BMI

**Timing:** Baseline

**Reporting Source:** Clinical

**Response Options:** Numerical value of height in cm

### ➤ Date of diagnosis

**Variable:** Date of diagnoses of pulmonary sarcoidosis

**Definition:**

- Diagnosed at the clinic: date of the multi-disciplinary meeting.

- Diagnosed somewhere else: date letter lung physician when the diagnosis is announced.

**Timing:** Baseline

**Reporting Source:** Clinical

**Response Options:** DD/MM/YYYY

### ➤ Recorded history of (comorbidities)

**Variable:** Comorbidities

**Definition:** presence of one or more additional diseases or disorders

**Timing:** Baseline

**Reporting Source:** Patient-reported

**Response Options:** Multiple options possible:

1 = no comorbidity

2 = myocardial infarction

3 = congestive heart failure

4 = coronary artery disease

5 = cerebrovascular disease

6 = dementia

7 = COPD

8 = connective tissue disease

9 = peptic ulcer disease

10 = diabetes mellitus

11 = chronic kidney disease

12 = hemiplegia

13 = systemic hypertension

14 = liver disease mild

15 = liver disease moderate to severe

16 = other cancer (within last 5 years)

17 = peripheral vascular disease

18 = sleep apnoea

999 = unknown



\*The assumption here is that most important comorbidities are registered in the electronic patient record.

➤ **Multi organ involvement**

**Variable:** multi-organ involvement

**Definition:** multi-organ involvement regarding sarcoidosis, based on the WASOG multi-organ involvement in patients with confirmed sarcoidosis (Table 1).

**Timing:** every 6 months

**Reporting Source:** clinical

**Response Options:**

**lungs**

1= Highly probable/ at least probable

2= Possible/not probable

3= Unknown

**neurologic**

1= Highly probable/ at least probable

2= Possible/not probable

3= Unknown

**non-thoracic lymph node**

1= Highly probable/ at least probable

2= Possible/not probable

3= Unknown

**renal**

1= Highly probable/ at least probable

2= Possible/not probable

3= Unknown

**cardiac**

1= Highly probable/ at least probable

2= Possible/not probable

3= Unknown

**skin**

1= Highly probable/ at least probable

2= Possible/not probable

3= Unknown

**eyes**

1= Highly probable/ at least probable

2= Possible/not probable

3= Unknown

**liver**

1= Highly probable/ at least probable

2= Possible/not probable

3= Unknown

**bone marrow**

1= Highly probable/ at least probable

2= Possible/not probable  
3= Unknown

**spleen**

1= Highly probable/ at least probable  
2= Possible/not probable  
3= Unknown

**bone/joints**

1= Highly probable/ at least probable  
2= Possible/not probable  
3= Unknown

**ear/nose/throat**

1= Highly probable/ at least probable  
2= Possible/not probable  
3= Unknown

**parotid / salivary glands**

1= Highly probable/ at least probable  
2= Possible/not probable  
3= Unknown

**muscles**

1= Highly probable/ at least probable  
2= Possible/not probable  
3= Unknown

**hypercalcemia / hypercalcuria / nephrolithiasis**

1= Highly probable/ at least probable  
2= Possible/not probable  
3= Unknown

**Table 1. Multi-organ involvement**

Definition of organ involvement:

- 1) Positive biopsy is of the organ or is one of the following conditions
- 2) Assumes no other cause identified (such as infection, trauma, pre-existing condition, or co-existing disease).
- 3) Other situations may be specified.

| ORGAN                   | HIGHLY PROBABLE                                                                                                                                                                                                                                                                                                                                                                                               | AT LEAST PROBABLE                                                                                                                                                                                                                                                                                                                                                                           | POSSIBLE                                                                                      |
|-------------------------|---------------------------------------------------------------------------------------------------------------------------------------------------------------------------------------------------------------------------------------------------------------------------------------------------------------------------------------------------------------------------------------------------------------|---------------------------------------------------------------------------------------------------------------------------------------------------------------------------------------------------------------------------------------------------------------------------------------------------------------------------------------------------------------------------------------------|-----------------------------------------------------------------------------------------------|
| LUNGS                   | CXR: bilateral hilar adenopathy<br>Chest CT: perilymphatic nodules<br>Chest CT: symmetrical hilar/mediastinal adenopathy<br>PET/Gallium-67: mediastinal/hilar enhancement                                                                                                                                                                                                                                     | CXR: diffuse infiltrates<br>CXR: upper lobe fibrosis<br>Chest CT: peribronchial thickening<br>BAL: lymphocytic alveolitis<br>BAL: elevated CD4/CD8 ratio<br>PET/Gallium-67: diffuse parenchymal lung enhancement<br>TBNA: lymphoid aggregates/giant cells                                                                                                                                   | CXR: localized infiltrate<br><br>PFT: obstruction                                             |
| NEUROLOGIC              | Clinical syndrome consistent with granulomatous inflammation of the meninges, brain, ventricular (CSF) system, cranial nerves, pituitary gland, spinal cord, cerebral vasculature or nerve roots<br>And<br>An abnormal MRI characteristic of neurosarcoidosis, defined as exhibiting abnormal enhancement following the administration of gadolinium or a cerebrospinal fluid exam demonstrating inflammation | Isolated facial palsy, negative MRI<br>Clinical syndrome consistent with granulomatous inflammation of the meninges, brain, ventricular (CSF) system, cranial nerves, pituitary gland, spinal cord, cerebral vasculature, nerve roots but without characteristic MRI or CSF findings                                                                                                        | Seizures, negative MRI<br><br>Cognitive decline, negative MRI                                 |
| NON-THORACIC LYMPH NODE |                                                                                                                                                                                                                                                                                                                                                                                                               | Multiple enlarged palpable cervical or epitrochlear lymph nodes without B symptoms<br><br>Enlarged lymph nodes identified by imaging in at least 2 peripheral or visceral lymph node stations without B symptoms                                                                                                                                                                            |                                                                                               |
| RENAL                   |                                                                                                                                                                                                                                                                                                                                                                                                               | Treatment-responsive renal failure with no other risk factors.<br>Treatment-responsive renal failure in patient with diabetes and/or hypertension.                                                                                                                                                                                                                                          | Renal failure with other potential risk factors                                               |
| CARDIAC                 |                                                                                                                                                                                                                                                                                                                                                                                                               | Treatment responsive CM or AVNB<br>Reduced LVEF in the absence of other clinical risk factors<br>Spontaneous or inducible sustained VT with no other risk factor<br>Mobitz type II or 3rd degree heart block<br>Patchy uptake on dedicated cardiac PET<br>Delayed enhancement on CMR<br>Positive gallium uptake<br>Defect on perfusion scintigraphy or SPECT scan<br>T2 prolongation on CMR | Reduced LVEF in the presence of other risk factors (e.g., HTN, DM)<br><br>Atrial dysrhythmias |

|                                                 |                                                                                                                                                                                                                                                                                                                                                   |                                                                                                                                                                                                                                                                                                                                         |                                                                      |
|-------------------------------------------------|---------------------------------------------------------------------------------------------------------------------------------------------------------------------------------------------------------------------------------------------------------------------------------------------------------------------------------------------------|-----------------------------------------------------------------------------------------------------------------------------------------------------------------------------------------------------------------------------------------------------------------------------------------------------------------------------------------|----------------------------------------------------------------------|
| SKIN                                            | Lupus pernio                                                                                                                                                                                                                                                                                                                                      | Subcutaneous nodules or plaques<br>Inflammatory papules within a scar or tattoo<br>Violaceous or erythematous annular lesions<br>Violaceous or erythematous macular, papular lesions around the eyes, nose, or mouth                                                                                                                    | Atypical lesions: ulcerative, erythrodermic, alopecic, ichthyosiform |
| EYES                                            | Uveitis<br>Optic neuritis<br>Mutton fat keratic precipitates<br>Iris nodules<br>Snowball/string of pearls (pars planitis)                                                                                                                                                                                                                         | Lacrimal gland swelling<br>Trabecular meshwork nodules<br>Retinitis<br>Scleritis<br>Multiple chorioretinal peripheral lesions<br>Adnexal nodularity<br>Candle wax drippings                                                                                                                                                             | Cataract<br>Glaucoma<br>Red eye                                      |
| LIVER                                           |                                                                                                                                                                                                                                                                                                                                                   | Abdominal imaging demonstrating hepatomegaly<br>Abdominal imaging demonstrating hepatic nodules                                                                                                                                                                                                                                         |                                                                      |
| BONE MARROW                                     | PET displaying diffuse uptake                                                                                                                                                                                                                                                                                                                     |                                                                                                                                                                                                                                                                                                                                         |                                                                      |
| SPLEEN                                          |                                                                                                                                                                                                                                                                                                                                                   | Low attenuation nodules on CT<br>PET/gallium-67 uptake in splenic nodules<br>Splenomegaly on imaging or physical examination                                                                                                                                                                                                            |                                                                      |
| BONE / JOINTS                                   | Typical radiographic features (trabecular pattern, osteolysis, cysts/punched out lesions)                                                                                                                                                                                                                                                         | Dactylitis<br>Nodular tenosynovitis<br>Positive PET, MRI, or gallium-67 bone imaging                                                                                                                                                                                                                                                    | Arthralgias                                                          |
| EAR / NOSE / THROAT                             |                                                                                                                                                                                                                                                                                                                                                   | Granulomatous changes on direct laryngoscopy<br>Consistent imaging studies (e.g. sinonasal erosion, mucoperiosteal thickening, positive PET scan)                                                                                                                                                                                       | Chronic sinusitis                                                    |
| PAROTID / SALIVARY GLANDS                       | Positive gallium-67 scan ("Panda sign")<br>Positive PET scan of the parotid glands                                                                                                                                                                                                                                                                | Symmetrical parotitis with syndrome of mumps<br>Enlarged salivary glands                                                                                                                                                                                                                                                                | Dry mouth                                                            |
| MUSCLES                                         |                                                                                                                                                                                                                                                                                                                                                   | Positive imaging (MRI, Gallium-67)<br>Palpable muscle masses                                                                                                                                                                                                                                                                            | Myalgias                                                             |
| HYPERCALCEMIA / HYPERCALCURIA / NEPHROLITHIASIS | Hypercalcemia plus all of the following:<br>a) a normal serum PTH level;<br>b) a normal or increased 1,25-OH dihydroxy vitamin D level;<br>c) a low 25-OH vitamin D level<br>Hypercalciuria plus all of the following:<br>a) a normal serum PTH level; b) a normal or increased 1,25-OH dihydroxy vitamin D level; c) a low 25-OH vitamin D level | Nephrolithiasis plus all of the following:<br>a) a normal serum PTH level;<br>b) a normal or increased 1,25-diOH vitamin D level;<br>c) a low 25-OH vitamin D level<br>hypercalciuria without serum PTH and 25 and 1,25 vitamin D levels<br><br>Nephrolithiasis with calcium stones, without serum PTH and 25 and 1,25 vitamin D levels | Nephrolithiasis, no stone analysis                                   |

From: as defined at WASOG congress 2014 (unpublished)

➤ **Opinion stage**

**Variable:** opinion stage

**Definition:** opinion stage to the clinic

**Timing:** baseline

**Reporting Source:** clinical

**Response Options:**

1= first opinion  
2= second opinion  
3 = third opinion  
999 = unknown

➤ **Smoking history**

**Variable:** smoking history

**Definition:** smoking habits throughout live

**Timing:** baseline

**Reporting Source:** patient-reported

**Response Options:**

1 = never  
2 = ever  
3 = active  
999 = unknown

➤ **Socio-economic status**

**Variable:** postal code

**Definition:** socio-economic status through postal code

**Timing:** baseline

**Reporting Source:** administrative

**Response Options:** depending on the country

XXXX  
or  
XXXXX

➤ **Stadium X-thorax**

**Variable:** Scadding stage

**Definition:** stadium based on Scadding-classification

**Timing:** baseline

**Reporting Source:** clinical

**Response Options:**

1 = Scadding stage 0 normal chest radiograph  
2 = Scadding stage I hilar or mediastinal nodal enlargement only  
3 = Scadding stage II nodal enlargement and parenchymal disease and III parenchymal disease only  
4 = Scadding stage IV significant fibrotic lesions/end stage disease  
999 = unknown

#### Appendix 4. Prioritizing outcome indicators for the treatment of pulmonary sarcoidosis.

|          |                                                                   | Impact  |            | Control |            | Volume  |            |
|----------|-------------------------------------------------------------------|---------|------------|---------|------------|---------|------------|
|          |                                                                   | Average | Stand. Dev | Average | Stand. Dev | Average | Stand. Dev |
| <b>1</b> | <b>TIER 1 - SURVIVAL</b>                                          |         |            |         |            |         |            |
|          | Mortality 1y after diagnosis                                      | 10,0    | 0,0        | 4,8     | 1,7        | 3,4     | 2,4        |
|          | Mortality 3y after diagnosis                                      | 10,0    | 0,0        | 4,7     | 1,2        | 4,4     | 1,8        |
|          | Mortality 5y after diagnosis                                      | 9,9     | 0,3        | 4,9     | 1,4        | 5,9     | 1,7        |
| <b>2</b> | <b>TIER 1 - DEGREE OF RECOVERY/HEALTH</b>                         |         |            |         |            |         |            |
|          | Number of days lost from school/work due to sarcoidosis           | 7,9     | 1,1        | 4,7     | 1,2        | 8,4     | 0,7        |
|          | Number of days per year in the hospital due to sarcoidosis        | 6,9     | 1,1        | 5,4     | 1,7        | 5,9     | 1,5        |
|          | Number of emergency room visits due to sarcoidosis                | 6,4     | 1,0        | 4,4     | 2,2        | 4,7     | 1,6        |
|          | Activity marker in blood reduction: ACE                           | 3,3     | 0,8        | 3,9     | 1,0        | 6,5     | 2,3        |
|          | Activity marker in blood reduction: sIL2R                         | 3,3     | 0,8        | 3,9     | 1,0        | 7,1     | 1,8        |
|          | Pulmonary function improvement: FEV1                              | 6,8     | 1,6        | 5,1     | 2,0        | 8,0     | 1,5        |
|          | Pulmonary function improvement: forced vital capacity (FVC)       | 7,0     | 1,6        | 5,6     | 2,1        | 8,3     | 1,6        |
|          | Pulmonary function improvement: diffusion capacity of lung (DLCO) | 6,9     | 1,7        | 5,6     | 2,1        | 7,9     | 1,5        |
|          | QoL RAND-36                                                       | 6,8     | 1,4        | 4,9     | 1,6        | 8,6     | 1,3        |
|          | QoL: % of patients having sleeping problems 1y after diagnosis    | 6,8     | 1,5        | 4,4     | 2,1        | 6,9     | 1,6        |
|          | Radiological changes                                              | 4,8     | 2,9        | 5,3     | 1,8        | 6,8     | 1,8        |
| <b>3</b> | <b>TIER 2 - TIME TO RECOVERY/ NORMAL ACTIVITIES</b>               |         |            |         |            |         |            |
|          | % of patients with remission within 2y after diagnosis            | 8,4     | 1,3        | 4,3     | 1,7        | 7,7     | 1,4        |
| <b>4</b> | <b>TIER 2 - DISUTILITY OF CARE OR TREATMENT PROCESS</b>           |         |            |         |            |         |            |
|          | Early side effects (< 12 mo after diagnosis) due to medication    |         |            |         |            |         |            |
|          | Bone thinning (osteoporosis)                                      | 6,8     | 1,6        | 7,2     | 1,0        | 4,9     | 2,0        |

|          |                                                                   |     |     |     |     |     |     |
|----------|-------------------------------------------------------------------|-----|-----|-----|-----|-----|-----|
|          | Cataract                                                          | 7,3 | 1,6 | 5,1 | 1,8 | 5,6 | 1,0 |
|          | Diabetes                                                          | 8,0 | 1,3 | 5,9 | 1,6 | 6,6 | 1,2 |
|          | Gastro-intestinal complaints                                      | 7,0 | 1,3 | 5,5 | 2,1 | 6,3 | 1,8 |
|          | Hypertension                                                      | 4,1 | 1,5 | 5,1 | 1,7 | 5,9 | 1,1 |
|          | Liver function impairment                                         | 4,3 | 2,0 | 5,0 | 2,0 | 5,3 | 1,7 |
|          | Weight increase                                                   | 8,1 | 1,0 | 6,1 | 1,7 | 8,6 | 1,0 |
| <b>5</b> | <b>TIER 3 - SUSTAINABILITY OF RECOVERY OR HEALTH OVER TIME</b>    |     |     |     |     |     |     |
|          | Clinical Outcome Status (COS) 5y after diagnosis                  | 7,8 | 0,7 | 5,3 | 1,4 | 8,1 | 1,1 |
|          | Incidence of second organ involvement 1, 3 or 5 y after diagnosis | 7,1 | 1,1 | 4,1 | 1,2 | 6,6 | 1,4 |
|          | Percentage exacerbations (readmissions)                           | 7,9 | 0,9 | 5,2 | 2,0 | 6,6 | 0,7 |
|          | Relapse rate                                                      | 8,3 | 0,5 | 4,7 | 1,8 | 7,6 | 0,7 |
| <b>6</b> | <b>TIER 3 - LONG-TERM CONSEQUENCES OF THERAPY</b>                 |     |     |     |     |     |     |
|          | Late side effects (> 12 months after diagnosis) due to medication |     |     |     |     |     |     |
|          | Bone thinning (osteoporosis)                                      | 7,4 | 1,0 | 7,4 | 0,8 | 6,6 | 1,4 |
|          | Cataract                                                          | 7,0 | 1,2 | 5,3 | 2,4 | 5,8 | 1,5 |
|          | Diabetes                                                          | 7,9 | 0,7 | 5,7 | 2,1 | 6,4 | 1,9 |
|          | Gastro-intestinal complaints                                      | 6,4 | 1,3 | 5,0 | 1,8 | 5,6 | 1,7 |
|          | Hypertension                                                      | 4,8 | 1,3 | 4,9 | 1,4 | 5,8 | 1,5 |
|          | Liver function impairment                                         | 4,3 | 1,5 | 4,4 | 1,2 | 5,1 | 2,1 |
|          | Weight increase                                                   | 8,0 | 0,9 | 6,2 | 1,7 | 7,4 | 1,9 |
|          | Percentage of patients developing lung fibrosis                   | 8,2 | 0,8 | 4,7 | 1,9 | 6,5 | 1,9 |

***Guidance provided to participants:***

- Impact on patient

2: outcome hardly has impact on well-being of patient

4: outcome has somewhat impact on well-being of patient

6: outcome has a moderate impact on well-being of patient

8: outcome has a strong impact on well-being of patient

10: outcome has an extreme impact on well-being of patient

you can also use the intermediate scores 1, 3, 5, 7, 9

- Influence of quality of delivery

2: outcome is hardly determined by quality of care delivery value chain (CDVC)

4: outcome is somewhat determined by quality of care delivery value chain (CDVC)

6: outcome is moderately determined by quality of care delivery value chain (CDVC)

8: outcome is strongly determined by quality of care delivery value chain (CDVC)

10: outcome is extremely determined by quality of care delivery value chain (CDVC)

you can also use the intermediate scores 1, 3, 5, 7, 9

- Volume of negative events

2: negative event only impacts very few patients (0,1-0,2%)

4: negative event impacts few patients (0,5 -1%)

6: negative event impacts some patients (2-5%)

8: negative event impacts substantial percentage of patients (10-25%)

10: negative event impacts many of our patients (>50%)

you can also use the intermediate scores 1, 3, 5, 7, 9



# SARCOIDOSIS - Outcome Indicators prioritized

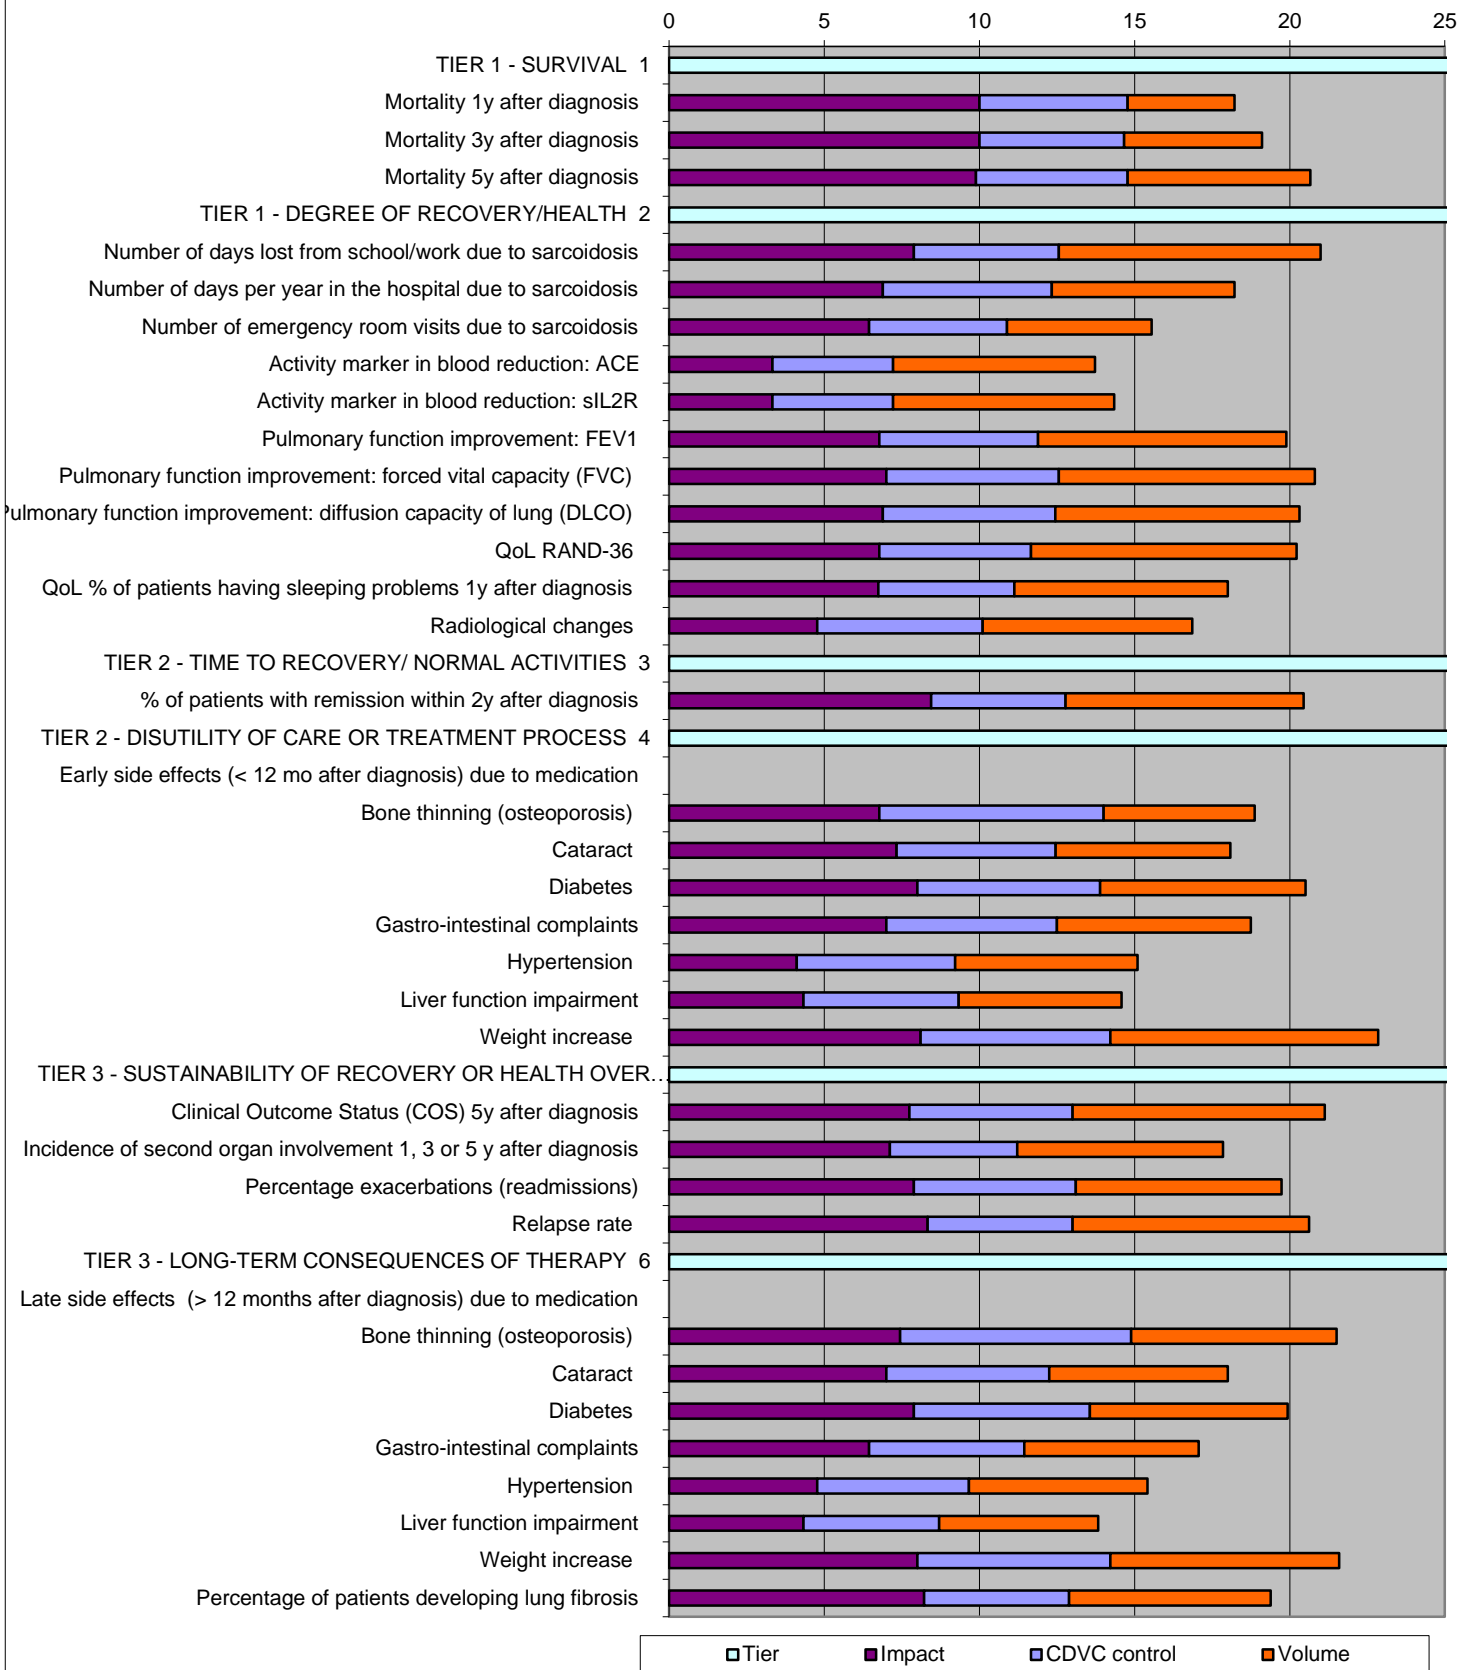

**Appendix 5.** King's sarcoidosis questionnaire ©

This questionnaire is designed to assess the impact of sarcoidosis on various aspects of your life. Read each question carefully and select the answer that best applies to you. Please answer ALL questions, as honestly as you can. This questionnaire is confidential. All questions relate to how **sarcoidosis** has affected your health.

**General health**

| In the last 2 weeks ...                                                                             | All the time | Most of the time | A good bit of the time | Some of the time | A little of the time | Hardly of the time | None of the time |
|-----------------------------------------------------------------------------------------------------|--------------|------------------|------------------------|------------------|----------------------|--------------------|------------------|
| 1. I have felt frustrated                                                                           | 1            | 2                | 3                      | 4                | 5                    | 6                  | 7                |
| 2. I have had trouble concentrating                                                                 | 1            | 2                | 3                      | 4                | 5                    | 6                  | 7                |
| 3. I have lacked motivation                                                                         | 1            | 2                | 3                      | 4                | 5                    | 6                  | 7                |
| 4. I have felt tired                                                                                | 1            | 2                | 3                      | 4                | 5                    | 6                  | 7                |
| 5. I have felt anxious                                                                              | 1            | 2                | 3                      | 4                | 5                    | 6                  | 7                |
| 6. I have felt aches and pains in my muscles/joints                                                 | 1            | 2                | 3                      | 4                | 5                    | 6                  | 7                |
| 7. I have felt embarrassed                                                                          | 1            | 2                | 3                      | 4                | 5                    | 6                  | 7                |
| 8. I have worried about my weight                                                                   | 1            | 2                | 3                      | 4                | 5                    | 6                  | 7                |
| 9. I have worried about my sarcoidosis                                                              | 1            | 2                | 3                      | 4                | 5                    | 6                  | 7                |
| In the last 2 weeks...                                                                              | All the time | Most of the time | A good bit of the time | Some of the time | A little of the time | Hardly of the time | None of the time |
| 10. Tiredness has interfered with my normal social activities such as going out with friends/family | 1            | 2                | 3                      | 3                | 5                    | 6                  | 7                |

## Lung

Does sarcoidosis affect your lungs? If not, go to next section.

| In the last 2 weeks...                                                   | All the time | Most of the time | A good bit of the time | Some of the time | A little of the time | Hardly of the time | None of the time |
|--------------------------------------------------------------------------|--------------|------------------|------------------------|------------------|----------------------|--------------------|------------------|
| 11. My cough has caused pain/discomfort                                  | 1            | 2                | 3                      | 4                | 5                    | 6                  | 7                |
| 12. I have been breathless climbing stairs or walking up slight inclines | 1            | 2                | 3                      | 4                | 5                    | 6                  | 7                |
| 13. I have had to take deep breaths, also known as 'air hunger'          | 1            | 2                | 3                      | 4                | 5                    | 6                  | 7                |
| 14. My chest has felt tight                                              | 1            | 2                | 3                      | 4                | 5                    | 6                  | 7                |
| 15. I have had episodes of breathlessness                                | 1            | 2                | 3                      | 4                | 5                    | 6                  | 7                |
| 16. I have experienced chest pains                                       | 1            | 2                | 3                      | 4                | 5                    | 6                  | 7                |

## Medication

Are you taking any medication for sarcoidosis? If not, go to next section.

| In the last 2 weeks...                                                 | A huge amount | A considerable amount | a moderate amount | A modest amount | A small amount | A tiny amount | None at all |
|------------------------------------------------------------------------|---------------|-----------------------|-------------------|-----------------|----------------|---------------|-------------|
| 17. I have worried about side effects of my medication for sarcoidosis | 1             | 2                     | 3                 | 4               | 5              | 6             | 7           |
| 18. I have felt worse because of my medication                         | 1             | 2                     | 3                 | 4               | 5              | 6             | 7           |
| 19. I have gained weight because                                       | 1             | 2                     | 3                 | 4               | 5              | 6             | 7           |

|                  |  |  |  |  |  |  |  |
|------------------|--|--|--|--|--|--|--|
| of my medication |  |  |  |  |  |  |  |
|------------------|--|--|--|--|--|--|--|

**Skin**

Does sarcoidosis affect your skin? If not, go to next section.

| In the last 2 weeks...                                               | A huge amount | A considerable amount | a moderate amount      | A modest amount  | A small amount       | A tiny amount      | None at all      |
|----------------------------------------------------------------------|---------------|-----------------------|------------------------|------------------|----------------------|--------------------|------------------|
| 20. I have been bothered by my skin problems                         | 1             | 2                     | 3                      | 4                | 5                    | 6                  | 7                |
| 21. I have been concerned about changes in colour of my skin lesions | 1             | 2                     | 3                      | 4                | 5                    | 6                  | 7                |
|                                                                      | All the time  | Most of the time      | A good bit of the time | Some of the time | A little of the time | Hardly of the time | None of the time |
| 22. I have been embarrassed about my skin                            | 1             | 2                     | 3                      | 4                | 5                    | 6                  | 7                |

**Eyes**

Does sarcoidosis affect your eyes? If not, go to next section.

| In the last 2 weeks...                       | All the time | Most of the time | A good bit of the time | Some of the time | A little of the time | Hardly of the time | None of the time |
|----------------------------------------------|--------------|------------------|------------------------|------------------|----------------------|--------------------|------------------|
| 23. I have had dry eyes                      | 1            | 2                | 3                      | 4                | 5                    | 6                  | 7                |
| 24. I have had difficulty with bright lights | 1            | 2                | 3                      | 4                | 5                    | 6                  | 7                |
| 25. My eyes have been red                    | 1            | 2                | 3                      | 4                | 5                    | 6                  | 7                |
| 26. I have had pain in/or around the eyes    | 1            | 2                | 3                      | 4                | 5                    | 6                  | 7                |
| 27. I have had difficulty reading            | 1            | 2                | 3                      | 4                | 5                    | 6                  | 7                |
| 28. I have had blurred vision                | 1            | 2                | 3                      | 4                | 5                    | 6                  | 7                |
| 29. I have been worried about my eyesight    | 1            | 2                | 3                      | 4                | 5                    | 6                  | 7                |

## Appendix 6. Fatigue assessment scale (FAS)

The following ten statements refer to how you usually feel. Per statement you can choose one out of five answer categories, varying from Never to Always.

Please circle the answer to each question that is applicable to you. Please give an answer to each question, even if you do not have any complaints at the moment.

1 = Never, 2 = Sometimes (about monthly or less); 3 = Regularly (about a few times a month); 4 = Often (about weekly) and 5 = Always (about every day).

|                                                             | Never | Sometimes | Regularly | Often | Always |
|-------------------------------------------------------------|-------|-----------|-----------|-------|--------|
| 1. I am bothered by fatigue                                 | 1     | 2         | 3         | 4     | 5      |
| 2. I get tired very quickly                                 | 1     | 2         | 3         | 4     | 5      |
| 3. I don't do much during the day                           | 1     | 2         | 3         | 4     | 5      |
| 4. I have enough energy for everyday life                   | 1     | 2         | 3         | 4     | 5      |
| 5. Physically, I feel exhausted                             | 1     | 2         | 3         | 4     | 5      |
| 6. I have problems to start things                          | 1     | 2         | 3         | 4     | 5      |
| 7. I have problems to think clearly                         | 1     | 2         | 3         | 4     | 5      |
| 8. I feel no desire to do anything                          | 1     | 2         | 3         | 4     | 5      |
| 9. Mentally, I feel exhausted                               | 1     | 2         | 3         | 4     | 5      |
| 10. When I am doing something, I can concentrate quite well | 1     | 2         | 3         | 4     | 5      |

© ild care foundation; [www.ildcare.nl](http://www.ildcare.nl); permission was provided by the ild care foundation: [info@ildcare.nl](mailto:info@ildcare.nl)
